# Supplementary material
Source: MDPI journal article supplement (https://www.mdpi.com/2311-7524/7/5/101)
Supplement: s1 [file s1]

**Table S1.** Effect of UV-B exposure (68 kJ m<sup>-2</sup> day<sup>-1</sup>) in nine different sweet basil ecotypes at different recovery time (0, 4h, 24 and 48) on selected chlorophyll *a* fluorescence parameters. Analysis of variance was used for comparisons. Means within each column (*O. basilicum* ecotypes) and within each chlorophyll *a* fluorescence parameter assessed followed by different letters are significantly different ( $P < 0.05$ ; Tukey's multiple range test,  $n > 5$ ).

| <i>O. basilicum</i> ecotypes |     |           |           |           |          |          |          |           |          |          |
|------------------------------|-----|-----------|-----------|-----------|----------|----------|----------|-----------|----------|----------|
|                              |     | OCI142    | OCI148    | OCI149    | OCI30    | OCI160   | OCI370   | OCI102    | OCI118   | OCI126A  |
| <b>Fv/Fm</b>                 | 0h  | 0.82 a    | 0.83 a    | 0.83 a    | 0.83 a   | 0.84 a   | 0.81 a   | 0.82 a    | 0.84 a   | 0.83 a   |
|                              | 4h  | 0.58 b    | 0.58 b    | 0.37 b    | 0.59 b   | 0.60 b   | 0.62 b   | 0.58 b    | 0.70 b   | 0.47 b   |
|                              | 24h | 0.29 c    | 0.40 c    | 0.04 c    | 0.55 b   | 0.56 b   | 0.58 cb  | 0.38 c    | 0.58 c   | 0.22 c   |
|                              | 48h | 0.04 d    | 0.07 d    | 0.01 d    | 0.20 c   | 0.70 a   | 0.48 c   | 0.05 d    | 0.19 d   | 0.13 c   |
| <b>TRo/CS</b>                | 0h  | 898.97 a  | 957.82 a  | 889.15 a  | 973.14 a | 928.01 a | 980.12 a | 868.718 a | 902.11 a | 899.11 a |
|                              | 4h  | 799.54 a  | 715.28 b  | 612.23 b  | 725.93 b | 750.53 b | 771.13 b | 731.32 b  | 664.54 b | 724.54 b |
|                              | 24h | 522.34 b  | 533.42 c  | 208.63 c  | 540.71 c | 626.79 c | 550.48 c | 448.92 c  | 251.88 c | 251.88 c |
|                              | 48h | 72.51 c   | 90.12 bd  | 3.94 d    | 172.49 d | 480.13 d | 334.02 d | 110.67 d  | 119.59 d | 109.59 d |
| <b>ETo/CS</b>                | 0h  | 464.47 a  | 471.04 a  | 453.79 a  | 527.10 a | 531.33 a | 506.26 a | 436.23 a  | 546.72 a | 473.93 a |
|                              | 4h  | 430.49 a  | 308.99 b  | 239.43 b  | 329.54 b | 490.79 a | 390.73 a | 338.11 b  | 446.87 b | 290.47 b |
|                              | 24h | 185.814 b | 201.50 c  | 42.78 c   | 251.28 b | 387.78 b | 192.58 b | 221.53 c  | 328.52 c | 124.38 c |
|                              | 48h | 26.33 c   | 33.99 d   | 14.48 c   | 52.38 c  | 331.13 b | 157.97 b | 56.85 d   | 83.78 d  | 45.32 c  |
| <b>DIo/CS</b>                | 0h  | 201.85 a  | 191.26 a  | 193.03 a  | 193.54 a | 196.44 a | 217.52 a | 194.01 a  | 198.81 a | 190.96 a |
|                              | 4h  | 667.53 b  | 445.82 b  | 1077.57 b | 499.66 b | 386.53 b | 605.27 b | 517.38 b  | 469.16 b | 476.88 b |
|                              | 24h | 1004.76 c | 953.38 c  | 1081.76 b | 442.79 b | 450.83 b | 680.62 b | 816.54 c  | 546.03c  | 946.83 c |
|                              | 48h | 1246.92 b | 1058.44 c | 1279.44 b | 816.93 c | 505.56 b | 854.06 b | 1033.01 c | 995.80 c | 887.29 c |
